# Supplementary material
Source: Springer Nature journal article supplement (https://publikationen.ub.uni-frankfurt.de/opus4/files/7207/12943_2009_465_MOESM9_ESM.PDF)
Supplement: MOESM9 [file 12943_2009_465_MOESM9_ESM.PDF]

**Additional file 9.** Concentrations of selected pro-angiogenic factors in the supernatants of neuroblastoma cell lines (detected by BD Cytometric Bead Array, Becton Dickinson, Heidelberg, Germany, following the manufacturer's instructions).

| Cell line                                  | Concentrations (pg/ml) of |            |      |               |        |
|--------------------------------------------|---------------------------|------------|------|---------------|--------|
|                                            | IL-8                      | angiogenin | bFGF | TNF- $\alpha$ | VEGF   |
| UKF-NB-3                                   | n.d.*                     | 142        | 46   | n.d.          | 410    |
| UKF-NB-3 <sup>r</sup> VCR <sup>10</sup>    | n.d.                      | n.d.       | 47   | n.d.          | 860    |
| UKF-NB-3 <sup>r</sup> DOX <sup>20</sup>    | n.d.                      | n.d.       | n.d. | n.d.          | 520    |
| UKF-NB-3 <sup>r</sup> CDDP <sup>1000</sup> | n.d.                      | 316        | 47   | n.d.          | 1550   |
| UKF-NB-2                                   | n.d.                      | n.d.       | 315  | n.d.          | > 5000 |
| UKF-NB-2 <sup>r</sup> VCR <sup>10</sup>    | n.d.                      | n.d.       | n.d. | n.d.          | n.d.   |
| UKF-NB-2 <sup>r</sup> DOX <sup>20</sup>    | n.d.                      | n.d.       | n.d. | n.d.          | 955    |
| UKF-NB-2 <sup>r</sup> CDDP <sup>1000</sup> | n.d.                      | n.d.       | 138  | n.d.          | 1490   |
| IMR-32                                     | n.d.                      | n.d.       | n.d. | n.d.          | 1370   |
| IMR-32 <sup>r</sup> VCR <sup>10</sup>      | n.d.                      | n.d.       | n.d. | n.d.          | 985    |
| IMR-32 <sup>r</sup> DOX <sup>20</sup>      | n.d.                      | n.d.       | n.d. | n.d.          | 3250   |
| IMR-32 <sup>r</sup> CDDP <sup>1000</sup>   | n.d.                      | n.d.       | n.d. | n.d.          | > 5000 |
| UKF-NB-4                                   | n.d.                      | n.d.       | n.d. | n.d.          | > 5000 |
| Be(2)-C                                    | n.d.                      | 1300       | n.d. | n.d.          | > 5000 |

\* n.d. = not detectable
